## **Incorporating polygenic scores in the twin model to estimate genotype-environment covariance: exploration of statistical power**

Conor V. Dolan<sup>1,3</sup>, Roel C. A. Huijskens, Camelia C. Minică<sup>1</sup>, Michael C. Neale<sup>1,2</sup>, & Dorret I. Boomsma<sup>1</sup>

<sup>1</sup>Department of Biological Psychology, Vrije Universiteit Amsterdam, Transitorium 2B03, Van der Boechorststraat 7, 1081 BT Amsterdam, The Netherlands

<sup>2</sup>Virginia Institute for Psychiatric and Behavioral Genetics, Virginia Commonwealth University, 1-156, P.O. Box 980126, Richmond, VA 23298-0126 USA

<sup>3</sup>Corresponding author. Email: [c.v.dolan@vu.nl](mailto:c.v.dolan@vu.nl)

## Abstract

The assumption in the twin model that genotypic and environmental variables are uncorrelated is primarily made to ensure parameter identification, not because researchers necessarily think that these variables are uncorrelated. Although the biasing effects of such correlations are well understood, it would be useful to be able to estimate these parameters in the twin model. Here we consider the possibility of relaxing this assumption by adding polygenic score to the (univariate) twin model. We demonstrated numerically and analytically this extension renders the additive genetic (A) – unshared environmental correlation (E) and the additive genetic (A) - shared environmental (C) correlations simultaneously identified. We studied the statistical power to detect A-C and A-E correlations in the ACE model, and to detect A-E correlation in the AE model. The results showed that the power to detect these covariance terms, given 1000 MZ and 1000 DZ twin pairs ( $\alpha=0.05$ ), depends greatly on the parameter settings of the model. We show fixing the estimated percentage of variance in the outcome trait that is due to the polygenic scores greatly increases statistical power.

## Keywords

A-E covariance, A-C covariance, classical twin design, structural equation model, identification, statistical power

The classical twin design (Eaves, et al. 1978; Martin et al. 1997) arguably has been one of the most productive genetically informative designs in the study of human traits (Polderman et al. 2015). Twin studies have contributed greatly to our present knowledge concerning genetic and environmental contributions to individual differences in psychological traits (e.g., Plomin, DeFries, Knopik, and Neiderhise, 2016; Turkheimer, 2002; Plomin and Deary, 2016) and multivariate and longitudinal extensions of the classical twin design (Martin and Eaves, 1977) have provided insights into the etiology of comorbidity and stability of traits and disorders. However, the interpretation of results from the uni- or multivariate model depend on its model assumptions. The main assumptions of the CTD that are often evoked concern genotype-environment covariance (assumed to be absent), genotype-environment interaction (assumed to be absent), the equal environment assumption (the influence of shared environment assumed to be equal in MZ and DZ twins), and parental mating (assumed to be random for the trait that is analyzed). Given these assumptions, the results from the CTD can provide unbiased estimates of additive genetic (A), unshared environmental (E), and shared environmental (C) or dominance (D) variance components. The effect of violations of these are well understood (Verhulst & Hatemi, 2013; Purcell, 2002; Keller et al. 2009), so that estimates of variance components obtained in the twin model may be interpreted in the light of possible model violations. For instance, a significant estimate for C in the CTD may be the results of assortative mating, or of positive A-C correlation. A correlation between A and E contributes to the A variance component.

Many papers have been devoted to the detection and accommodation of model violations, either within the CTD (e.g., Purcell, 2002, Molenaar, et al. 2012, Eaves & Erkanli, 2003, Carey, 1986; Dolan, et al. 2014; Beam & Turkheimer, 2013), or in extended designs (e.g., Plomin, Loehlin, and DeFries, 1985; Narusyte, et al, 2008; Fulker, 1988; D'Onofrio, et al, 2003; Keller et al, 2009; Heath et al., 1985, Maes, et al, 2006). The aim of the present paper is to demonstrate that incorporating polygenic scores in the classical twin design in principle allows us to estimate the covariance between A and C and between A and E. In developmental psychology, such covariance terms are viewed as plausible, stemming from processes giving rise to passive, active or evocative genotype-environment covariance (Plomin, DeFries, and McClearn, 1977; Scarr and McCartney, 1983). Knafo & Jaffee, 2013; Kendler, 2012; Rutter and Silberg, 2002). Beyond demonstrating the principle, we explore the statistical power to estimate rGE under alternative models.

The idea of incorporating measured genetic information, either genetic variants or polygenic scores, in the twin design is not new. Previous approaches concerned measured

genetic markers in non-parametric linkage analysis (e.g., Haseman and Elston, 1977; Nance and Neale, 1989) or combined linkage-association analysis (e.g., Fulker, Cherny, Sham, Hewitt, 1999). Van den Oord and Snieder (2002) presented an extended twin model with measured genetic variable to test association in the presence of stratification and to test causal relationships. In a longitudinal study of attention problems, van Beijsterveldt et al. (2012) incorporated measured candidate gene information in a common factor twin model to test the association with the latent phenotype attention problems. Minică et al. (2018) presented an integration of the CTD and Mendelian randomization method, in which polygenic scores featured as genetic instruments. Bates et al. (2018) and Kong et al. (2018) proposed the use of polygenic scores based on transmitted and non-transmitted alleles specifically to detect genotype-environment covariance in the genetically informative trio design of parents and offspring. This method may obviously be applied in the extended twin design, including twins and their parents. To the best of our knowledge, the incorporation of polygenic scores in the twin design specifically to estimate A-E and A-C covariance has not been considered before.

The outline of this paper is as follows. First, we present the twin model, and the twin model extended with polygenic scores. Second, given the model for PGS in MZ and DZ twin pairs, we address the issues of parameter identification and power using exact data simulation. Third, we present the results of our power study. We conclude with a discussion.

### **The twin model with polygenic scores**

Let  $Y$  denote the phenotypic outcome variable of interest, and let  $GV_k$  denote the  $k$ -th genetic variant (GV) contributing to the variance of  $Y$ , where  $k = 1 \dots K$ , and  $K$  is the number of GVs contributing to individual differences in  $Y$ . We limit ourselves to an additive model, i.e., the GVs are additively coded (e.g., in the case of a di-allelic GV, 0, 1, or 2). The question how much of the variance in  $Y$  is explained by the  $GV_k$  ( $k = 1, \dots, K$ ) is addressed in the following regression model:

$$Y_i = b_0 + \sum_{k=1}^K b_k GV_{ki} + E_i^*$$

where  $b_0$  is the intercept,  $b_k$  is the  $k$ -th regression coefficient, subscript  $i$  denotes person, and  $E_i^*$  is the residual. Given a set of  $L$  of measured GVs, which are associated with the phenotypic  $Y$ , and the complementary set  $M$  unmeasured GVs ( $L + M = K$ ), we have

$$Y_i = b_0 + \sum_{l=1}^L b_l GV_{li} + \sum_{m=1}^M b_m GV_{mi} + E_i^*$$

Given estimates of the regression coefficients ( $b_l$ ) obtained in an independent GWA study, the polygenic risk score equals  $PGS_i = \sum_{l=1}^L b_l GV_{li}$  (e.g. Purcell et al. 2009; Dudbridge, 2013). The set  $L$  need not necessarily include GVs, which pass the genome-wide  $\alpha$ -level. To ease presentation, we assume GVs are in linkage equilibrium (uncorrelated), so that the decomposition of phenotypic variance is

$$\sigma^2_Y = \sum_{l=1}^L b_l^2 \sigma^2_{GVI} + \sum_{m=1}^M b_m^2 \sigma^2_{GVM} + \sigma^2_E.$$

In the classical twin design, the ACE decomposition is:

$$\sigma^2_Y = \sigma^2_A + \sigma^2_C + \sigma^2_E,$$

where we have partitioned the residual environmental variance  $\sigma^2_{E^*}$  into  $\sigma^2_C$  and  $\sigma^2_E$ . Given the presence of the polygenic scores, we can decompose the additive genetic variance  $\sigma^2_A$  into the observed component  $\sigma^2_{AL}$  and the latent components  $\sigma^2_{AM}$ :

$$\sigma^2_A = \sigma^2_{AL} + \sigma^2_{AM},$$

where  $\sigma^2_{AL} = \sum_{l=1}^L b_l^2 \sigma^2_{GVI}$  (the variance of the polygenic scores, i.e.,  $\sigma^2_{AL} = \sigma^2_{PGS}$ ), and  $\sigma^2_{AM} = \sum_{m=1}^M b_m^2 \sigma^2_{GVM}$ . The information in the classical univariate twin model, i.e., the 2x2 MZ and DZ covariance matrices, is sufficient to obtain unique estimates of the variance components  $\sigma^2_A$ ,  $\sigma^2_C$ , and  $\sigma^2_E$ . Figure 1 depicts the standard (ACE) twin model.

The twin model including the polygenic scores is depicted in Figures 2 and 3 (to avoid clutter). Figure 2 depicts the model with A-C covariance parameter  $\sigma_{AC}$ , and Figure 3 depicts the model with the A-E covariance parameter  $\sigma_{AE}$ . The parameter  $R^2$  is the proportion of additive genetic variance attributable to  $PGS_i$  ( $\sum_{l=1}^L b_l GV_{li}$ ), i.e.,  $\sigma^2_{AL}/\sigma^2_A$  or  $\sigma^2_{PGS}/\sigma^2_A$ . Limiting the model presentation to the covariance structure, we note that the standard ACE model (Figure 1) has three parameters (variance components  $\sigma^2_A$ ,  $\sigma^2_C$ , and  $\sigma^2_E$ ), whereas the extended twin model has 6 parameters, i.e., the three variance components  $\sigma^2_A$ ,  $\sigma^2_C$ , and  $\sigma^2_E$ , two covariance terms  $\sigma_{AE}$  and  $\sigma_{AC}$ , and the parameter  $R^2$ . The role of these parameters are shown in Table 1. Below we define effect sizes in terms of correlations, i.e.,  $r_{AC} = \sigma_{AC} / (\sigma_A * \sigma_C)$  and  $r_{AE} = \sigma_{AE} / (\sigma_A * \sigma_E)$ .

### Identification and resolution

The model is identified if the observed data provide sufficient information to obtain unique estimates of the unknown parameters when the likelihood of the data is maximized. In the present case, the observed information are the 3x3 MZ and the 4x4 DZ covariance matrices, containing the variances of, and the covariance among, the phenotype and the polygenic

scores obtained in the twins. The MZ covariance matrix is 3x3, as MZ twins, being genetically identical, have identical polygenic scores.

As the parameterization of the phenotypic means is irrelevant to the issue of the identification of the covariance structure model, we simply estimate each mean with a separate free parameter, and do not discuss them further. Let the vector  $\theta$  contain the parameters of the covariance part of the model:

$$\theta = [\sigma^2_A \sigma^2_C \sigma^2_E \sigma_{AC} \sigma_{AE} R^2].$$

The vector  $\theta$  does not include  $\sigma^2_{AL}$  and  $\sigma^2_{AK}$  explicitly, because these equal  $R^2 * \sigma^2_A$  and  $(1 - R^2) * \sigma^2_A$ , respectively. Local identification implies that different points in the vicinity of a given point in the admissible 6 dimensional parameter space  $\theta$  are associated with different expected covariance matrices  $\Sigma_{MZ}(\theta)$  and  $\Sigma_{DZ}(\theta)$  (Bollen and Bauldry, 2010; Bekker et al 1994). That is, we require that a change in the numerical value of one or more of the components in  $\theta$  give rise to a change in the matrices  $\Sigma_{MZ}(\theta)$  and  $\Sigma_{DZ}(\theta)$ . We evaluated local identification analytically using symbolic algebra in Maple (Heck, 2003). The local identification check centers on the rank of the Jacobian matrix (Bekker et al 1994). The Jacobian matrix contains the first-order derivatives of the elements in the matrices  $\Sigma_{MZ}(\theta)$  and  $\Sigma_{DZ}(\theta)$  with respect to the parameters in  $\theta$ . If the Jacobian is full column rank (as established using Maple), the model is locally identified. The advantage of this method is that it is necessary and sufficient; it does not depend on arbitrary numerical values of the parameters to establish local identification. We refer to Derks et al. (2006) and Minică et al. (2018) for other applications of this method in the context of twin modeling.

Having investigated local identification analytically, we proceeded to address the question of resolution by considering the statistical power to detect the parameters of interest. The issue of power is important, as formal local identification means that we can obtain unique parameter estimates, but tells us nothing about their precision. Specifically, the model may be formally identified, but empirically underidentified for certain sets of parameter values. We addressed the issue of power by conducting power analyses using exact data simulation (van de Sluis et al. 2008). We considered three parameter settings relating to the variance components, and combined them with various parameter  $R^2$  values and covariance parameters  $r_{AC}$  and  $r_{AE}$  (see Tables 2-4). We chose the values  $R^2 = .15$  and  $R^2 = .05$ , and set the values of  $r_{AC}$  and  $r_{AE}$  to equal 0, .15, or .25. The percentage of phenotypic variance due to the polygenic score is included in the Tables (2-5). For instance, in a model with  $\sigma^2_A = .333$ ,  $\sigma^2_C$

$=.333$ , and  $\sigma^2_E = .333$  (see Table 2A,B), the polygenic score variance components equal  $.333/.15 = .05$  or  $.333/.05 = 0.0167$ . As the total phenotypic variance equals 1.333, the polygenic scores account for equals  $100*(.05/1.333) = \sim 3.75\%$  ( $R^2 = .15$ ) or  $100*(.0167/1.333)$  ( $R^2 = .05$ ). The percentage of phenotypic variance explained polygenic score necessarily varies as a function of the parameter settings. That is, given a fixed value of  $R^2$ , this percentage will vary as a function of the other parameter values. We test the A-C covariance and A-E covariance in isolation and simultaneously in 36 additional parameter settings (see Tables 2, 3, and 4). As the effects of C are generally absent in adults (e.g., in intelligence, personality, psychopathology), we also considered the detection of  $\sigma_{AE} \neq 0$  in an AE model (i.e., with  $\sigma^2_C = 0$  and  $r_{AC} = 0$ ). The parameter settings are shown in Table 5.

In all cases, we set the sample sizes equal to  $N_{MZ} = 1000$  and  $N_{DZ} = 1000$  (in total 2000 pairs), and we adopted an  $\alpha$  of 0.05. We used normal theory maximum likelihood estimation throughout, and based our power calculations on the non-centrality parameter associated with the chi-square distribution (Martin, et al. 1978). The power analyses were done using OpenMx (Boker et al 2011; Neale et al 2016) in the R program (R core team, 2018). The OpenMx script is available (supplemental material), so that readers may calculate the power in other settings.

## Results

The analytical check using Maple demonstrated that the model is identified, on the basis of the 3x3 MZ and the 4x4 DZ phenotypic covariance matrices,  $\Sigma_{MZ}(\theta)$  and  $\Sigma_{DZ}(\theta)$ . That is, we can, at least in principle, obtain unique estimates of  $\theta = [\sigma^2_A \sigma^2_C \sigma^2_E \sigma_{AC} \sigma_{AE} R^2]$ . Tables 2A, 3A, and 4A shows the power given our parameter settings (associated non-centrality parameters are given in the supplemental material). The power varies considerably in Table 2A ( $\sigma^2_A = .333$ ,  $\sigma^2_C = .333$ ,  $\sigma^2_E = .333$ ), from .092 to .999. We observe power greater than the (arbitrary) value of .70 is observed in 6 cases. Of these 6, 5 are associated with the omnibus (2 df) test  $r_{AC} = 0$  and  $r_{AE} = 0$ . The 6th case involves the (1 df) test of  $r_{AE} = 0$ , given  $r_{AC} = 0$  (consistent with the model in which  $r_{AC} = 0$ ). Unsurprisingly, in all 6 cases, the  $R^2$  (i.e.,  $\sigma^2_{PGS}/\sigma^2_A$ ) equals .15, rather than .05. In these cases the polygenic scores explain between 3.7 and 4.29% of phenotypic variance. In Table 3A ( $\sigma^2_A = .5$ ,  $\sigma^2_C = .25$ ,  $\sigma^2_E = .25$ ), we see only three scenarios with power greater than .7. These again concern the 2df test ( $r_{AE} = 0$  &  $r_{AC} = 0$ ) and a test of  $r_{AE} = 0$ , given  $r_{AC} = 0$  (fixed to zero, consistent with the model) in the  $R^2 = .15$  conditions. The results in Table 4A ( $\sigma^2_A = .25$ ,  $\sigma^2_C = .5$ ,  $\sigma^2_E = .25$ ) largely resemble those of Table 2A. As the number of cases with

power  $>.70$  are limited, we conclude that the method may be underpowered given  $Nmz = Ndz = 1000$  and  $\alpha=.05$ .

By way of exploration, we considered the power given a known value of the parameter  $R^2$ , that is, we assume that we know how much the polygenic scores explain of the total additive genetic variance, for example from a large study in a comparable population. Tables 2B to 4A shows the power in the same parameter settings as given in Tables 2A to 4A, but with the parameter  $R^2$  fixed to its true value. The power is greatly improved by this measure. In Tables 2B, 3B, and 4B, we see 12, 11, and 16 cases, respectively, with power  $>.70$ . To obtain some insight into this finding, we calculated the correlations among the parameter estimates in case 2.12 (see Tables 2A and 2B), i.e., given  $\sigma^2_A=.333$ ,  $\sigma^2_C=.333$ ,  $\sigma^2_E=.333$ ,  $R^2=.15$ , and  $r_{AC} = r_{AE} = .25$ . This correlation is available in the OpenMx output (i.e., the OpenMx `vcov()` function). We know from Table 2A and 2B that the power to reject  $r_{AC}=0$  is low at .369 (Table 2A,  $R^2$  estimated) or .561 (Table 2A,  $R^2$  fixed), and the power to reject  $r_{AE}=0$  is .408 (Table 2A,  $R^2$  estimated) or .873 (Table 2B,  $R^2$  fixed). The low power to reject  $r_{AC}=0$  (.369) is due in part to the relatively large correlation between the parameter estimates  $r_{AC}$  and  $r_{AE}$  (-.82), implying that the effect of fixing one parameter (to zero) will be compensated by the other. We note that the correlation between the estimates of the A and C variance terms ( $\sigma^2_A$  and  $\sigma^2_C$ ) is also large (-.90), as is well-known. Having fixed the  $R^2$  parameter, we find that the correlations among the parameters  $r_{AC}$  and  $r_{AE}$  are appreciably lower -0.61. Interestingly, the correlation between the estimates of  $\sigma^2_A$  and  $\sigma^2_C$  is only -.21, which implies that the inclusion of polygenic scores in the twin model will greatly increase the power to detect C variance. The power to detect C in the standard ACE model is known to be low in general (Visscher, Gordon, and Neale, 2008).

Table 5 shows the power to detect  $r_{AE}$  (in the absence of  $r_{AC}$ ) in the AE model. With  $R^2$  estimated, we see 7 cases (of the 20 considered) with power greater than .7. The largest power (.978) is associated with  $\sigma_A^2 = .4$ ,  $\sigma_E^2 = .6$ ,  $R^2=.15$  and  $r_{AE} = .25$ . We repeated the analyses with the  $R^2$  parameter fixed to its true value. The power in all cases exceeds .97 (see Table 5 column 7). To provide more insight into the variation in the power over the parameter settings considered, we repeated the analyses with  $Nmz=Ndz=250$  (retaining  $\alpha=0.05$ ). Given  $Nmz=Ndz=250$ , we observe 10 cases with power greater than .7.



## Discussion

We addressed the question of whether incorporating polygenic scores into the classical twin model rendered the A-C and A-E correlations (or covariances) identified. Based on the analytical results relating to the column rank of the model's matrix of partial derivatives (Jacobian) matrix and given the estimation of correct numerical values in exact data simulation (van der Sluis et al, 2008), we established that both parameters, simultaneously estimated, are identified. The power to demonstrate that these correlations are greater than zero, in isolation (1df test) or together (2df test), given  $NMZ=NDZ=1000$  and  $\alpha=0.05$ , varied greatly as a function of the parameter settings. Overall, in view of the results in Tables 2A to 4A, we found the likelihood ratio tests to be underpowered in many cases. Fixing the  $R^2$  parameter to its true value helped greatly to remedy this lack of power (see Tables 2B to 4B). This solution is not too outlandish, as in practice, we often know the heritability of the phenotype of interest quite accurately (see Polderman et al. 2015), and the percentage of phenotypic variance explained by the polygenic scores. Based on that information, one can arrive at an approximate value of  $R^2$ . Also, in practice, one may vary the fixed  $R^2$  values to gauge the sensitivity of the estimates of  $r_{AC}$  and  $r_{AE}$  to the value of  $R^2$ .

We considered a polygenic score effect size that was expressed in terms of  $R^2$ , the proportion of total additive genetic variance attributable to the polygenic score. The values .05 and .15 are arbitrary, but not overly large. As shown in the Tables (2-4), these values imply that the polygenic scores account for between 1.25 ( $R^2=.05$ ) and 4.55 (Table 2A), between 1.85 ( $R^2=.05$ ) and 6.78 (Table 3A), and between 1.06 ( $R^2=.05$ ) and 3.49 % (Table 4A) of the phenotypic variance. If polygenic scores of the phenotype of interest at present do not reach these levels, they will likely do so in the future, given the results of ever larger genome wide association meta-analyses.

We have focused on the test of  $r_{AC}$  and  $r_{AE}$  in the basic univariate twin model. Clearly the incorporation of polygenic scores may facilitate detection and modeling of  $r_{AC}$  and  $r_{AE}$  in other models. From a developmental point of view, a longitudinal study of cognitive ability would benefit greatly by the incorporation of polygenic scores to determine whether age-related changes in the A and C variance components of intelligence (e.g., the decrease in C variance) are dependent on age-related changes in  $r_{AC}$  (Haworth et al. 2010, Tucker-Drob & Bates, 2016). While we have focused on covariance, we note that polygenic scores have wider applications in the study of genotype-environment interplay. Polygenic scores are already being used to study interaction (e.g., Colodro-Conde et al 2018; Peyrot, et al. 2014). Assigning

polygenic scores the role of moderator in the twin moderation model (Purcell, 2002) will facilitate the study of AxE and AxC interaction, allowing for the developmentally important distinction of AxC and AxE. By comparison, the method proposed by Molenaar et al (2012) is computationally more complex and likely to be less powerful, as it is based on the phenotypic twin data without polygenic scores.

In conclusion, the incorporation of polygenic scores in the twin model provides new possibilities to study interplay, as manifested in A-C and A-E covariance. We found that the present approach was often underpowered, given  $Nmz = Ndz = 1000$  and  $\alpha = 0.05$ , if the parameter  $R^2$  was estimated along with the other parameters in the model. To improve power, we proposed to fix  $R^2$  to a well-informed value (based on knowledge of the variance explained by the polygenic score). We suspect that in the coming years polygenic scores will gain statistical power, as their effect sizes (in terms of the amount of additive genetic variance explained) will increase, and their standard errors will decrease (due to larger sample sizes), so that ultimately this "fix" will not be necessary.

## **Acknowledgements.**

CVD acknowledges NWO top-talent grant 406-12-124 (awarded to Janneke de Kort); DIB acknowledges KNAW Academy Professor Award (PAH/6635); MCN and CCM were supported by the National Institute on Drug Abuse (DA-018673; PI: MCN).

## References

- Beam, C. R., & Turkheimer, E. (2013). Phenotype–environment correlations in longitudinal twin models. *Development and Psychopathology*, 25, 7–16.
- Bekker, P. A., Merckens, A. & Wansbeek, T. J. (1994). *Identification, Equivalent Models, and Computer Algebra: Statistical Modeling and Decision Science*. Academic Press.
- Boker, S.M, Neale, M.C., Hermine H. Maes, H.H, Wilde, M.J., Spiegel, M., Brick, T.R., Spies, J. Estabrook, R., Kenny, S., Bates, T.C., Mehta, P. and Fox, J. (2011). OpenMx: An Open Source Extended Structural Equation Modeling Framework. *Psychometrika*, 306-317. DOI:10.1007/s11336-010-9200-6
- Bollen, K. A. & Bauldry, S.(2010). Model identification and computer algebra. *Sociological Methods & Research*, 39, 127-156 .
- Carey G. (1986). Sibling imitation and contrast effects. *Behavior Genetics*, 16, 319–341. doi: 10.1007/BF01071314.
- Colodro-Conde, L., Couvy-Duchesne, B., Zhu, G., Coventry, W.L., Byrne, E.M, Gordon, S., Wright, M.J., Montgomery, G.W., Madden, P.A.F., Major Depressive Disorder Working Group of the Psychiatric Genomics Consortium, Ripke, S., LJ Eaves, L.J., Heath, A.C., Wray, N.R., Medland, S.E., and Martin, N.G. (2018). A direct test of the diathesis–stress model for depression *Molecular Psychiatry*, 23, 1590–1596; doi:10.1038/mp.2017.130.
- Derks, E. M., Dolan, C. V. & Boomsma, D. I. (2006). A test of the equal environment assumption (EEA) in multivariate twin studies. *Twin Research and Human Genetics*, 9 , 403-411.
- Dolan C.V., de Kort, J.M., van Beijsterveldt, T.C., Bartels, M., and Boomsma, D.I. (2014). GE covariance through phenotype to environment transmission: an assessment in longitudinal twin data and application to childhood anxiety. *Behavior Genetics*.44(3), 240-253. doi: 10.1007/s10519-014-9659-5.
- D’Onofrio B.M., Turkheimer E.N., Eaves L.J., Corey L.A., Berg K., Solaas M.H., et al. (2003). The role of the children of twins design in elucidating causal relations between parent characteristics and child outcomes. *Journal of Child Psychology and Psychiatry*, 44(8), 1130–1144.
- Dudbridge F. (2013). Power and predictive accuracy of polygenic risk scores. *PLoS Genet*. Mar;9(3):e1003348. doi: 10.1371/journal.pgen.1003348. Epub 2013 Mar 21. Erratum in: *PLoS Genet*. 2013 Apr;9(4).
- Eaves, L. J., Last, K. A., Young, P. A., and Martin, N. G. (1978). Model-fitting approaches to the analysis of human behavior. *Heredity*, 41, 249–320.
- Eaves L.J., Erkanli A. (2003). Markov Chain Monte Carlo approaches to analysis of genetic and environmental components of human developmental change and G X E interaction. *Behavior Genetics*, 33(3), 279–299. doi: 10.1023/A:1023446524917.

Eaves, L. J., Last K., Martin. N. G., & Jinks J. L. (1977). A progressive approach to non-additivity and genotype-environmental covariance in the analysis of human differences. *British Journal of Mathematical and Statistical Psychology*, 30(1):1–42.

Fulker, D. W. (1988). Genetic and cultural transmission in human behavior. In Weir, B. S., Eisen, E. J., Goodman, M. M., and Namkoong, G. (eds.), *Proceedings of the Second International Conference on Quantitative Genetics*, Sinauer, Sunderland, MA, pp. 318–340.

Haworth C.M., Wright M.J., Luciano M., Martin N.G., de Geus E.J., van Beijsterveldt C.E., Bartels M., Posthuma D., Boomsma D.I., Davis O.S., Kovas Y., Corley R.P., Defries J.C., Hewitt J.K., Olson R.K., Rhea S.A., Wadsworth S.J., Iacono W.G., McGue M., Thompson L.A., Hart S.A., Petrill S.A., Lubinski D., & Plomin R. (2010). The heritability of general cognitive ability increases linearly from childhood to young adulthood. *Molecular Psychiatry*, 15(11), 1112-20. doi: 10.1038/mp.2009.55.

Heath A.C., Kendler K.S., Eaves L.J., Markell D. (1985). The resolution of cultural and biological inheritance: informativeness of different relationships. *Behavior Genetics*, 15(5), 439–465.

Heck, A. (2003). *Introduction to Maple*, 3rd Edition. NY: Springer-Verlag.

Keller, M.C. Medland, S.E., Duncan, L.E., Hatemi, P.K., Neale, M.C., Maes, H.H.M, and Eaves, L.J. (2009) Modeling Extended Twin Family Data I: Description of the Cascade Model. *Twin Research and Human Genetics*, 12(1), 8–18.

Kendler, K. S. (2011). A conceptual overview of gene–environment interaction and correlation in a developmental context. In K. S. Kendler, S. R. Jaffee, & D. Romer (Eds.), *The dynamic genome and mental health: The role of genes and environments in youth development* ( pp. 5–28). New York: Oxford University Press.

Knafo, A & Jaffee, S, R. (2013). Gene–environment correlation in developmental psychopathology *Development and Psychopathology*, 25, 1–6 . doi:10.1017/S0954579412000855

Kong, A., Thorleifsson, G., Frigge, M. L., Vilhjalmsón, B. J., 682 Young, A. I., Thorgeirsson, T. E., ... Stefansson, K. (2018). The nature of nurture: Effects of parental genotypes. *Science*, 359, 424–428.

Maes H.H., Neale M.C., Kendler K.S., Martin N.G., Heath A.C., & Eaves L.J. (2006). Genetic and cultural transmission of smoking initiation: an extended twin kinship model. *Behavior Genetics*. 2006;36(6):795–808.

Martin, N.G. and Eaves, L.J. (1977). The genetical analysis of covariance structure. *Heredity*. 38, 79–95.

Martin N.G., Eaves L.J., Kersey M.J., and Davies P. (1978). The power of the classical twin study. *Heredity*, 40, 97–116. doi: 10.1038/hdy.1978.10.

Martin N, Boomsma D, and Machin G. (1997). A twin-pronged attack on complex traits. *Nature Genetics*, 17(4), 387-92.

Minică, C.C., Dolan, C.V., Boomsma, D.I., de Geus, E., and Neale, M.C. (2018). Extending Causality Tests with Genetic Instruments: An Integration of Mendelian Randomization with the Classical Twin Design. *Behavior Genetics* 48:337–349.

Molenaar, D. van der Sluis, S., Boomsma, D.I., and Dolan, C.V. (2012). Detecting Specific Genotype by Environment Interactions Using Marginal Maximum Likelihood Estimation in the Classical Twin Design. *Behavior Genetics* 42:483–499. DOI 10.1007/s10519-011-9522-x

Nance, W.E. and Neale, M.C. (1989). Partitioned twin analysis: A power study. *Behavior Genetics*, 19(1), 143–150.

Narusyte, J., Neiderhiser, J.M., D’Onofrio, B.M., Reiss, D., Spotts, E.L., Ganiban, J., & Lichtenstein, P. (2008). Testing different types of genotype–environment correlation: an extended children-of-twins model. *Developmental Psychology* 44(6), 1591–1603. doi:10.1037/a0013911.

Neale, M.C., Hunter MD, Pritikin JN, Zahery M, Brick TR, Kirkpatrick RM, Estabrook R, Bates TC, Maes, H.H., and Boker SM. (2016) OpenMx 2.0: Extended Structural Equation and Statistical Modeling. *Psychometrika*. 81(2):535-49.

Peyrot W.J., Milaneschi Y., Abdellaoui A., Sullivan P.F., Hottenga J.J., Boomsma D.I., et al. (2014) Effect of polygenic risk scores on depression in childhood trauma. *The British Journal of Psychiatry: The Journal of Mental Science*. 205(2):113–119.

Plomin R., DeFries J.C., Loehlin J.C. (1977). Genotype–environment interaction and correlation in the analysis of human behavior. *Psychological Bulletin*, 84:309–322. doi: 10.1037/0033-2909.84.2.309.

Plomin, R., Loehlin, J.C., DeFries J.C. (1985). Genetic and Environmental Components of "Environmental" Influences. *Developmental Psychology*, 21(3), 391-402.

Plomin, R., DeFries, J.C., Knopik, V.S., Neiderhiser, J.M. (2016). Top 10 Replicated Findings from Behavioral Genetics. *Perspectives in Psychological Science*, 11(1): 3–23. doi:10.1177/1745691615617439

Polderman, T.J.C., Benyamin, B., de Leeuw, C.A., Sullivan, P.F., van Bochoven, A, Visscher, P. M., Posthuma, D. (2015). Meta-analysis of the heritability of human traits based on fifty years of twin studies. *Nature Genetics*, 47, 702–709.

Purcell, S. (2002) Variance components models for gene–environment interaction in twin analysis. *Twin Res* 5, 554–571.

Purcell, S. M., Wray, N. R., Stone, J. L., Visscher, P. M., O’Donovan, M. C., Sullivan, P. F., ... Scolnick, E. M. (2009). Common polygenic variation contributes to risk of schizophrenia and bipolar disorder. *Nature*, 460(7256), 748–752. <https://doi.org/10.1038/nature08185>

R Core Team (2018). R: A language and environment for statistical computing. R Foundation for Statistical Computing, Vienna, Austria. URL <https://www.R-project.org/>.

Tucker-Drob, E.M. and Bates, T.C. (2016). Large Cross-National Differences in Gene × Socioeconomic Status Interaction on Intelligence. *Psychological Science*, 27(2), 138–149.

Rutter, M., & Silberg, J. (2002). Gene–environment interplay in relation to emotional and behavioral disturbance. *Annual Review of Psychology*, 53, 463–490.

Turkheimer, E. (2000). Three Laws of Behavior Genetics and What They Mean. *Current Directions in Psychological Science*, 9 (5), 160 - 164.

Scarr, S. & McCartney, K. (1983). How people make their own environments: A theory of genotype → environment effects. *Child Development*, 54, 424-435.

van Beijsterveldt, C.E.M., Middeldorp, C.M., Slof-Op't Landt, M.C.T., Bartels, M, Hottenga, J.J., Eka, H., Suchiman, D, Slagboom, P.E., Boomsma, D.I. (2011). Influence of Candidate Genes on Attention Problems in Children: A Longitudinal Study. *Behavior Genetics*, 41:155–164. DOI 10.1007/s10519-010-9406-5

van den Oord, E.J.C.G. and Snieder, H. (2002) Including Measured Genotypes in Statistical Models to Study the Interplay of Multiple Factors Affecting Complex Traits. *Behavior Genetics*, 32(1), 1- 22.

van der Sluis, S., Dolan, C. V., Neale, M. C. & Posthuma, D. (2008). Power calculations using exact data simulation: a useful tool for genetic study designs. *Behavior Genetics*, 38 , 202-211.

Verhulst, B. and Hatemi P.K. (2013). Gene-Environment Interplay in Twin Models. *Political Analysis*, 21(3):368-389.

Visscher, M., Gordon, S. and Neale, M.C. (2008). Power of the Classical Twin Design Revisited: II Detection of Common Environmental Variance. *Twin Research and Human Genetics*, 11(1): 48–54. doi: 10.1375/twin.11.1.48.

**Table 1: Covariance terms (see Figures 2 and 3).**

| Covariance terms                                    | parameterization                  |
|-----------------------------------------------------|-----------------------------------|
| <b>MZ and DZ twins</b>                              |                                   |
| $\text{cov}(A_{L1}, E_1) = \text{cov}(A_{L2}, E_2)$ | $R^2 \sigma_{AE}$                 |
| $\text{cov}(A_{M1}, E_1) = \text{cov}(A_{M2}, E_2)$ | $(1-R^2) \sigma_{AE}$             |
| $\text{cov}(A_{L1}, C_1) = \text{cov}(A_{L2}, C_2)$ | $R^2 \sigma_{AC}$                 |
| $\text{cov}(A_{M1}, C_1) = \text{cov}(A_{M2}, C_2)$ | $(1-R^2) \sigma_{AC}$             |
| $\text{cov}(A_{L1}, C_2) = \text{cov}(A_{L2}, C_1)$ | $R^2 \sigma_{AC}$                 |
| $\text{cov}(A_{M1}, C_2) = \text{cov}(A_{M2}, C_1)$ | $(1-R^2) \sigma_{AC}$             |
| <b>MZ twins</b>                                     |                                   |
| $\text{cov}(A_{L1}, A_{L2})$                        | $\sigma_{AL}^2$                   |
| $\text{cov}(A_{M1}, A_{M2})$                        | $\sigma_{AM}^2$                   |
| $\text{cov}(A_{L1}, E_2) = \text{cov}(A_{L2}, E_1)$ | $R^2 \sigma_{AE}$                 |
| $\text{cov}(A_{M1}, E_2) = \text{cov}(A_{M2}, E_1)$ | $(1-R^2) \sigma_{AE}$             |
| <b>DZ twins</b>                                     |                                   |
| $\text{cov}(A_{L1}, A_{L2})$                        | $\frac{1}{2} * \sigma_{AL}^2$     |
| $\text{cov}(A_{M1}, A_{M2})$                        | $\frac{1}{2} * \sigma_{AM}^2$     |
| $\text{cov}(A_{L1}, E_2) = \text{cov}(A_{L2}, E_1)$ | $\frac{1}{2} R^2 \sigma_{AE}$     |
| $\text{cov}(A_{M1}, E_2) = \text{cov}(A_{M2}, E_1)$ | $\frac{1}{2} (1-R^2) \sigma_{AE}$ |

$\sigma_{AL}^2$  is the additive genetic variance due to the polygenic score

$\sigma_{AM}^2$  is the residual additive genetic variance

$R^2$  equals  $\sigma_{AL}^2 / \sigma_A^2$ , where  $\sigma_A^2 = \sigma_{AL}^2 + \sigma_{AM}^2$ .

$\sigma_{AE}$  and  $\sigma_{AC}$  are the A-E and A-C covariance terms.



**Table 2A.**  $\sigma^2_A = .333$ ,  $\sigma^2_C = .333$ ,  $\sigma^2_E = .333$

| set  | $R^2$ | $r_{AC}$ | $r_{AE}$ | %    | $r_{AC}=0$<br>-<br>1 df<br>power | $r_{EC}=0$<br>-<br>1df<br>power | $r_{AC}=0$ & $r_{AC}=0$   $r_{AE}=0$  <br>$r_{AE}=0$ $r_{AE}=0$ $r_{AC}=0$<br>2 df 1 df<br>power power | $r_{AE}=0$  <br>$r_{AC}=0$<br>1df<br>power |
|------|-------|----------|----------|------|----------------------------------|---------------------------------|--------------------------------------------------------------------------------------------------------|--------------------------------------------|
| 2.1  | .05   | .15      | 0        | 1.52 | .092                             | -                               | .134 .092                                                                                              | -                                          |
| 2.2  | .15   | .15      | 0        | 4.55 | .183                             | -                               | .339 .183                                                                                              | -                                          |
| 2.3  | .05   | .25      | 0        | 1.43 | .165                             | -                               | .285 .165                                                                                              | -                                          |
| 2.4  | .15   | .25      | 0        | 4.29 | .410                             | -                               | <b>.733</b> .410                                                                                       | -                                          |
| 2.5  | .05   | 0        | .15      | 1.52 | -                                | .093                            | .142 -                                                                                                 | .183                                       |
| 2.6  | .15   | 0        | .15      | 4.55 | -                                | .187                            | .366 -                                                                                                 | .461                                       |
| 2.7  | .05   | 0        | .25      | 1.43 | -                                | .164                            | .311 -                                                                                                 | .398                                       |
| 2.8  | .15   | 0        | .25      | 4.29 | -                                | .409                            | <b>.776</b> -                                                                                          | <b>.855</b>                                |
| 2.9  | .05   | .15      | .15      | 1.39 | .088                             | .092                            | .372 -                                                                                                 | -                                          |
| 2.10 | .15   | .15      | .15      | 4.17 | .173                             | .186                            | <b>.858</b> -                                                                                          | -                                          |
| 2.11 | .05   | .25      | .25      | 1.25 | .150                             | .164                            | <b>.761</b> -                                                                                          | -                                          |
| 2.12 | .15   | .25      | .25      | 3.75 | .369                             | .408                            | <b>.999</b> -                                                                                          | -                                          |

$\alpha = 0.05$ ; df = degrees of freedom; % = percentage of phenotypic variance due to the polygenic score;  $Nmz=Ndz=1000$ .  $r_{AE}=0 | r_{AC}=0$  denotes the test of  $r_{AE}=0$ , where  $r_{AC}$  is fixed to zero (consistent with the model). ( $r_{AC}=0 | r_{AE}=0$  defined in the same way).

**Table 2B.**  $\sigma^2_A = .333$ ,  $\sigma^2_C = .333$ ,  $\sigma^2_E = .333$

| set  | $R^2$ | $r_{AC}$ | $r_{AE}$ | %    | $r_{AC}=0$<br>-<br>1 df<br>power | $r_{EC}=0$<br>-<br>1df<br>power | $r_{AC}=0$ & $r_{AC}=0$   $r_{AE}=0$  <br>$r_{AE}=0$ $r_{AE}=0$ $r_{AC}=0$<br>2 df 1 df<br>power power | $r_{AE}=0$  <br>$r_{AC}=0$<br>1df<br>power |
|------|-------|----------|----------|------|----------------------------------|---------------------------------|--------------------------------------------------------------------------------------------------------|--------------------------------------------|
| 2.1  | .05   | .15      | 0        | 1.52 | .151                             | -                               | .134 .151                                                                                              | -                                          |
| 2.2  | .15   | .15      | 0        | 4.55 | .293                             | -                               | .339 .293                                                                                              | -                                          |
| 2.3  | .05   | .25      | 0        | 1.43 | .317                             | -                               | .285 .632                                                                                              | -                                          |
| 2.4  | .15   | .25      | 0        | 4.29 | .632                             | -                               | <b>.733</b> .632                                                                                       | -                                          |
| 2.5  | .05   | 0        | .15      | 1.52 | -                                | .454                            | .429 -                                                                                                 | .531                                       |
| 2.6  | .15   | 0        | .15      | 4.55 | -                                | .487                            | .388 -                                                                                                 | .692                                       |
| 2.7  | .05   | 0        | .25      | 1.43 | -                                | <b>.848</b>                     | <b>.848</b> -                                                                                          | <b>.909</b>                                |
| 2.8  | .15   | 0        | .25      | 4.29 | -                                | <b>.878</b>                     | <b>.956</b> -                                                                                          | <b>.979</b>                                |
| 2.9  | .05   | .15      | .15      | 1.39 | .141                             | .450                            | .624 -                                                                                                 | -                                          |
| 2.10 | .15   | .15      | .15      | 4.17 | .268                             | .483                            | <b>.923</b> -                                                                                          | -                                          |
| 2.11 | .05   | .25      | .25      | 1.25 | .280                             | <b>.842</b>                     | <b>.963</b> -                                                                                          | -                                          |
| 2.12 | .15   | .25      | .25      | 3.75 | .561                             | <b>.873</b>                     | <b>1.00</b> -                                                                                          | -                                          |

$\alpha = 0.05$ ; df = degrees of freedom; % = percentage of phenotypic variance due to the polygenic score;  $Nmz=Ndz=1000$ ,  $R^2$  fixed to true value.  $r_{AE}=0 | r_{AC}=0$  denotes the test of  $r_{AE}=0$ , where  $r_{AC}$  is fixed to zero (consistent with the model). ( $r_{AC}=0 | r_{AE}=0$  defined in the same way).

**Table 3A.**  $\sigma^2_A = .5$ ,  $\sigma^2_C = .25$ ,  $\sigma^2_E = .25$ .

| set  | $R^2$ | $r_{AC}$ | $r_{AE}$ | %    | $r_{AC}=0$<br>-<br>1 df<br>power | $r_{EC}=0$<br>-<br>1df<br>power | $r_{AC}=0$ & $r_{AC}=0$   $r_{AE}=0$  <br>$r_{AE}=0$ $r_{AE}=0$ $r_{AC}=0$<br>2 df 1 df<br>power power | $r_{AE}=0$  <br>$r_{AC}=0$<br>1df<br>power |
|------|-------|----------|----------|------|----------------------------------|---------------------------------|--------------------------------------------------------------------------------------------------------|--------------------------------------------|
| 3.1  | .05   | .15      | 0        | 2.26 | .081                             | -                               | .110 .081                                                                                              | -                                          |
| 3.2  | .15   | .15      | 0        | 6.78 | .151                             | -                               | .262 .151                                                                                              | -                                          |
| 3.3  | .05   | .25      | 0        | 2.12 | .136                             | -                               | .219 .136                                                                                              | -                                          |
| 3.4  | .15   | .25      | 0        | 6.37 | .328                             | -                               | .597 .328                                                                                              | -                                          |
| 3.5  | .05   | 0        | .15      | 2.26 | -                                | .082                            | .117 -                                                                                                 | .148                                       |
| 3.6  | .15   | 0        | .15      | 6.78 | -                                | .154                            | .284 -                                                                                                 | .366                                       |
| 3.7  | .05   | 0        | .25      | 2.12 | -                                | .135                            | .238 -                                                                                                 | .309                                       |
| 3.8  | .15   | 0        | .25      | 6.37 | -                                | .326                            | .644 -                                                                                                 | <b>.743</b>                                |
| 3.9  | .05   | .15      | .15      | 2.06 | .078                             | .082                            | .283 -                                                                                                 | -                                          |
| 3.10 | .15   | .15      | .15      | 6.19 | .142                             | .153                            | <b>.736</b> -                                                                                          | -                                          |
| 3.11 | .05   | .25      | .25      | 1.85 | .124                             | .134                            | .617 -                                                                                                 | -                                          |
| 3.12 | .15   | .25      | .25      | 5.54 | .292                             | .325                            | <b>.988</b> -                                                                                          | -                                          |

$\alpha = 0.05$ ; df = degrees of freedom; % = percentage of phenotypic variance due to the polygenic score;  $N_m = N_d = 1000$ .  $r_{AE}=0 | r_{AC}=0$  denotes the test of  $r_{AE}=0$ , where  $r_{AC}$  is fixed to zero (consistent with the model). ( $r_{AC}=0 | r_{AE}=0$  defined in the same way).

**Table 3B.**  $\sigma^2_A = .5$ ,  $\sigma^2_C = .25$ ,  $\sigma^2_E = .25$ .

| set  | $R^2$ | $r_{AC}$ | $r_{AE}$ | %    | $r_{AC}=0$<br>-<br>1 df<br>power | $r_{EC}=0$<br>-<br>1df<br>power | $r_{AC}=0$ & $r_{AC}=0$   $r_{AE}=0$  <br>$r_{AE}=0$ $r_{AE}=0$ $r_{AC}=0$<br>2 df 1 df<br>power power | $r_{AE}=0$  <br>$r_{AC}=0$<br>1df<br>power |
|------|-------|----------|----------|------|----------------------------------|---------------------------------|--------------------------------------------------------------------------------------------------------|--------------------------------------------|
| 3.1  | .05   | .15      | 0        | 2.26 | .129                             | -                               | .110 .129                                                                                              | -                                          |
| 3.2  | .15   | .15      | 0        | 6.78 | .259                             | -                               | .262 .259                                                                                              | -                                          |
| 3.3  | .05   | .25      | 0        | 2.12 | .260                             | -                               | .219 .260                                                                                              | -                                          |
| 3.4  | .15   | .25      | 0        | 6.37 | .566                             | -                               | .597 .566                                                                                              | -                                          |
| 3.5  | .05   | 0        | .15      | 2.26 | -                                | .526                            | .474 -                                                                                                 | .578                                       |
| 3.6  | .15   | 0        | .15      | 6.78 | -                                | .539                            | .583 -                                                                                                 | .687                                       |
| 3.7  | .05   | 0        | .25      | 2.12 | -                                | <b>.907</b>                     | <b>.888</b> -                                                                                          | <b>.937</b>                                |
| 3.8  | .15   | 0        | .25      | 6.37 | -                                | <b>.916</b>                     | <b>.953</b> -                                                                                          | <b>.977</b>                                |
| 3.9  | .05   | .15      | .15      | 2.06 | .121                             | .523                            | .613 -                                                                                                 | -                                          |
| 3.10 | .15   | .15      | .15      | 6.19 | .237                             | .536                            | <b>.874</b> -                                                                                          | -                                          |
| 3.11 | .05   | .25      | .25      | 1.85 | .229                             | <b>.903</b>                     | <b>.961</b> -                                                                                          | -                                          |
| 3.12 | .15   | .25      | .25      | 5.54 | .496                             | <b>.912</b>                     | <b>.999</b> -                                                                                          | -                                          |

$\alpha = 0.05$ ; df = degrees of freedom; % = percentage of phenotypic variance due to the polygenic score;  $N_m = N_d = 1000$ ,  $R^2$  fixed to true value.  $r_{AE}=0 | r_{AC}=0$  denotes the test of  $r_{AE}=0$ , where  $r_{AC}$  is fixed to zero (consistent with the model). ( $r_{AC}=0 | r_{AE}=0$  defined in the same way).

**Table 4A.**  $\sigma^2_A = .25$ ,  $\sigma^2_C = .5$ ,  $\sigma^2_E = .25$ .

| set  | $R^2$ | $r_{AC}$ | $r_{AE}$ | %    | $r_{AC}=0$<br>-<br>1 df<br>power | $r_{EC}=0$<br>-<br>1df<br>power | $r_{AC}=0$ & $r_{AC}=0$  <br>$r_{AE}=0$ $r_{AE}=0$<br>2 df 1 df<br>power power | $r_{AE}=0$  <br>$r_{AC}=0$<br>1df<br>power |
|------|-------|----------|----------|------|----------------------------------|---------------------------------|--------------------------------------------------------------------------------|--------------------------------------------|
| 4.1  | .05   | .15      | 0        | 1.13 | .122                             | -                               | .170 .122                                                                      | -                                          |
| 4.2  | .15   | .15      | 0        | 3.39 | .281                             | -                               | .451 .281                                                                      | -                                          |
| 4.3  | .05   | .25      | 0        | 1.06 | .250                             | -                               | .384 .250                                                                      | -                                          |
| 4.4  | .15   | .25      | 0        | 3.19 | .620                             | -                               | <b>.868</b> .620                                                               | -                                          |
| 4.5  | .05   | 0        | .15      | 1.16 | -                                | .092                            | .123 -                                                                         | .157                                       |
| 4.6  | .15   | 0        | .15      | 3.49 | -                                | .185                            | .301 -                                                                         | .386                                       |
| 4.7  | .05   | 0        | .25      | 1.11 | -                                | .163                            | .261 -                                                                         | .337                                       |
| 4.8  | .15   | 0        | .25      | 3.33 | -                                | .405                            | .681 -                                                                         | <b>.776</b>                                |
| 4.9  | .05   | .15      | .15      | 1.06 | .117                             | .092                            | .394 -                                                                         | -                                          |
| 4.10 | .15   | .15      | .15      | 3.18 | .265                             | .185                            | <b>.877</b> -                                                                  | -                                          |
| 4.11 | .05   | .25      | .25      | 0.96 | .226                             | .162                            | <b>.794</b> -                                                                  | -                                          |
| 4.12 | .15   | .25      | .25      | 2.88 | .573                             | .404                            | <b>.999</b> -                                                                  | -                                          |

$\alpha = 0.05$ ; df = degrees of freedom; % = percentage of phenotypic variance due to the polygenic score;  $Nmz=Ndz=1000$ .  $r_{AE}=0 | r_{AC}=0$  denotes the test of  $r_{AE}=0$ , where  $r_{AC}$  is fixed to zero (consistent with the model). ( $r_{AC}=0 | r_{AE}=0$  defined in the same way).

**Table 4B.**  $\sigma^2_A = .25$ ,  $\sigma^2_C = .5$ ,  $\sigma^2_E = .25$ .

| set  | $R^2$ | $r_{AC}$ | $r_{AE}$ | %    | $r_{AC}=0$<br>-<br>1 df<br>power | $r_{EC}=0$<br>-<br>1df<br>power | $r_{AC}=0$ & $r_{AC}=0$  <br>$r_{AE}=0$ $r_{AE}=0$<br>2 df 1 df<br>power power | $r_{AE}=0$  <br>$r_{AC}=0$<br>1df<br>power |
|------|-------|----------|----------|------|----------------------------------|---------------------------------|--------------------------------------------------------------------------------|--------------------------------------------|
| 4.1  | .05   | .15      | 0        | 1.13 | .199                             | -                               | .170 .199                                                                      | -                                          |
| 4.2  | .15   | .15      | 0        | 3.39 | .420                             | -                               | .451 .420                                                                      | -                                          |
| 4.3  | .05   | .25      | 0        | 1.06 | .435                             | -                               | .384 .435                                                                      | -                                          |
| 4.4  | .15   | .25      | 0        | 3.19 | <b>.815</b>                      | -                               | <b>.868</b> <b>.815</b>                                                        | -                                          |
| 4.5  | .05   | 0        | .15      | 1.16 | -                                | .445                            | .402 -                                                                         | .501                                       |
| 4.6  | .15   | 0        | .15      | 3.49 | -                                | .478                            | .528 -                                                                         | .633                                       |
| 4.7  | .05   | 0        | .25      | 1.11 | -                                | <b>.839</b>                     | <b>.821</b> -                                                                  | <b>.889</b>                                |
| 4.8  | .15   | 0        | .25      | 3.33 | -                                | <b>.871</b>                     | <b>.928</b> -                                                                  | <b>.962</b>                                |
| 4.9  | .05   | .15      | .15      | 1.06 | .188                             | .442                            | .636 -                                                                         | -                                          |
| 4.10 | .15   | .15      | .15      | 3.18 | .392                             | .475                            | <b>.933</b> -                                                                  | -                                          |
| 4.11 | .05   | .25      | .25      | 0.96 | <b>.396</b>                      | <b>.836</b>                     | <b>.968</b> -                                                                  | -                                          |
| 4.12 | .15   | .25      | .25      | 2.88 | <b>.762</b>                      | <b>.868</b>                     | <b>1.00</b> -                                                                  | -                                          |

$\alpha = 0.05$ ; df = degrees of freedom; % = percentage of phenotypic variance due to the polygenic score;  $Nmz=Ndz=1000$ ,  $R^2$  fixed to true value.  $r_{AE}=0 | r_{AC}=0$  denotes the test of  $r_{AE}=0$ , where  $r_{AC}$  is fixed to zero (consistent with the model). ( $r_{AC}=0 | r_{AE}=0$  defined in the same way).

**Table 5.** Parameter settings, power to reject  $r_{AE}=0$  (1 df likelihood ratio test), and the non-centrality parameter values. ( $\alpha = 0.05$ ). Column 7 and 8 "power  $R^2$  fixed" is the power to reject  $r_{AE}=0$ , given  $R^2$  fixed to the true value, shown in column 4. "%" is the percentage of phenotypic variance due to the polygenic score.

| set  | $\sigma^2_A$ | $\sigma^2_E$ | $R^2$ | $r_{AE}$ | %    | power <sup>1</sup> | power $R^2$ fixed <sup>1</sup> | power $R^2$ fixed <sup>2</sup> |
|------|--------------|--------------|-------|----------|------|--------------------|--------------------------------|--------------------------------|
| 5.1  | 0.3          | 0.7          | 0.05  | 0.15     | 1.32 | 0.336              | <b>0.993</b>                   | 0.599                          |
| 5.2  | 0.3          | 0.7          | 0.15  | 0.15     | 3.96 | <b>0.778</b>       | <b>0.997</b>                   | 0.657                          |
| 5.3  | 0.3          | 0.7          | 0.05  | 0.25     | 1.22 | 0.686              | <b>1.000</b>                   | <b>0.937</b>                   |
| 5.4  | 0.3          | 0.7          | 0.15  | 0.25     | 3.66 | <b>0.992</b>       | <b>1.000</b>                   | <b>0.963</b>                   |
| 5.5  | 0.4          | 0.6          | 0.05  | 0.15     | 1.74 | 0.287              | <b>0.996</b>                   | 0.631                          |
| 5.6  | 0.4          | 0.6          | 0.15  | 0.15     | 5.23 | <b>0.703</b>       | <b>0.998</b>                   | 0.673                          |
| 5.7  | 0.4          | 0.6          | 0.05  | 0.25     | 1.61 | 0.604              | <b>1.000</b>                   | <b>0.952</b>                   |
| 5.8  | 0.4          | 0.6          | 0.15  | 0.25     | 4.82 | <b>0.978</b>       | <b>1.000</b>                   | <b>0.968</b>                   |
| 5.9  | 0.5          | 0.5          | 0.05  | 0.15     | 2.17 | 0.243              | <b>0.996</b>                   | 0.628                          |
| 5.10 | 0.5          | 0.5          | 0.15  | 0.15     | 6.52 | 0.617              | <b>0.997</b>                   | 0.663                          |
| 5.11 | 0.5          | 0.5          | 0.05  | 0.25     | 2.00 | 0.519              | <b>1.000</b>                   | <b>0.953</b>                   |
| 5.12 | 0.5          | 0.5          | 0.15  | 0.25     | 6.00 | <b>0.950</b>       | <b>1.000</b>                   | <b>0.966</b>                   |
| 5.13 | 0.6          | 0.4          | 0.05  | 0.15     | 2.62 | 0.201              | <b>0.992</b>                   | 0.592                          |
| 5.14 | 0.6          | 0.4          | 0.15  | 0.15     | 7.85 | 0.522              | <b>0.995</b>                   | 0.624                          |
| 5.15 | 0.6          | 0.4          | 0.05  | 0.25     | 2.41 | 0.432              | <b>1.000</b>                   | <b>0.937</b>                   |
| 5.16 | 0.6          | 0.4          | 0.15  | 0.25     | 7.23 | <b>0.897</b>       | <b>1.000</b>                   | <b>0.953</b>                   |
| 5.17 | 0.7          | 0.3          | 0.05  | 0.15     | 3.08 | 0.162              | <b>0.980</b>                   | 0.518                          |
| 5.18 | 0.7          | 0.3          | 0.15  | 0.15     | 9.23 | 0.417              | <b>0.987</b>                   | 0.551                          |
| 5.19 | 0.7          | 0.3          | 0.05  | 0.25     | 2.85 | 0.342              | <b>1.000</b>                   | <b>0.895</b>                   |
| 5.20 | 0.7          | 0.3          | 0.15  | 0.25     | 8.54 | <b>0.801</b>       | <b>1.000</b>                   | <b>0.917</b>                   |

<sup>1</sup>NMZ=NDZ=1000, <sup>2</sup>NMZ=NDZ=250.

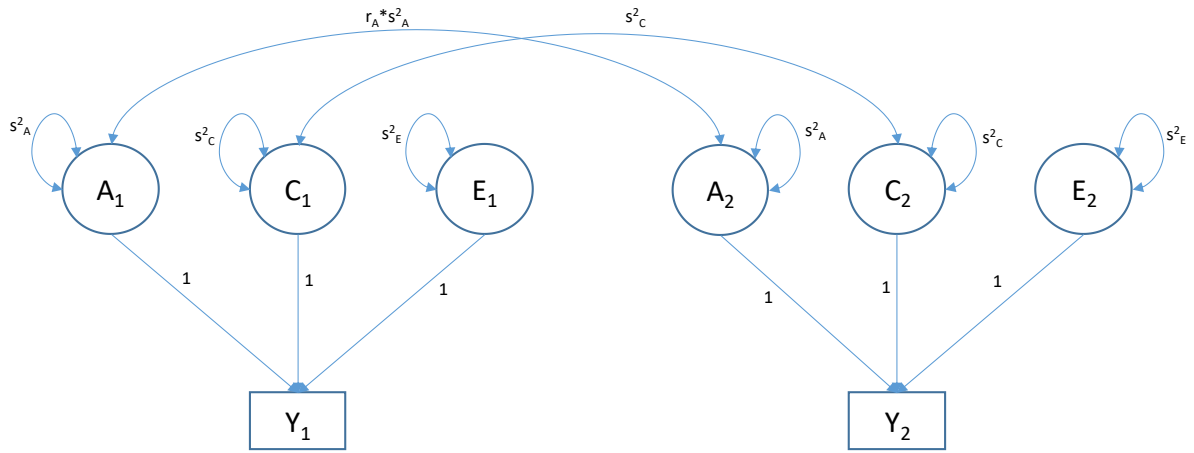

Figure 1: standard ACE twin model ( $r_A = 1$  in MZs and  $r_A = .5$  in DZs)

Figure 2: ACE twin model with polygenic scores ( $A_{L1}$ ,  $A_{L2}$ ), including A-E covariance ( $\sigma_{AE}$ )

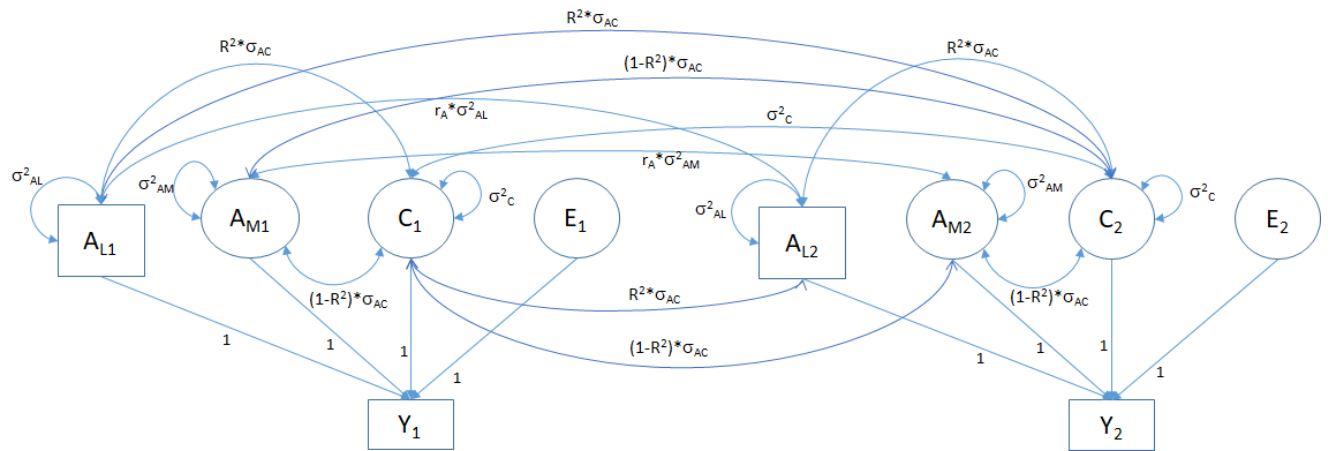

Figure 3: ACE twin model with polygenic scores ( $A_{L1}$ ,  $A_{L2}$ ), including A-C covariance ( $\sigma_{AC}$ )

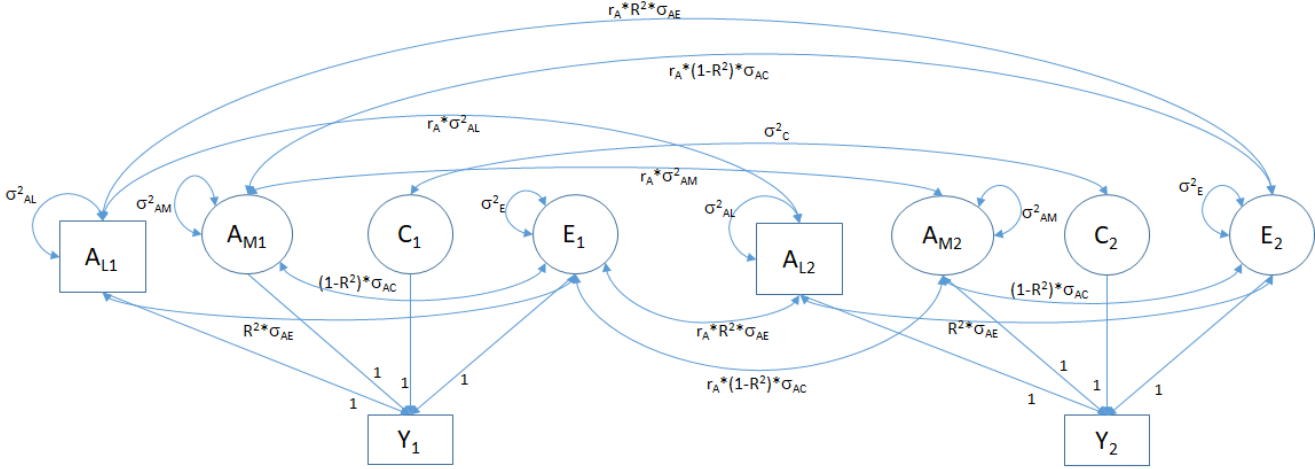

Source: https://www.biorxiv.org/content/10.1101/702738v2.full.pdf
